# Supplementary material for: Gut Microbiomes of Freshwater Mussels (Unionidae) Are Taxonomically and Phylogenetically Variable across Years but Remain Functionally Stable
Source: PubMed Central journal article supplement (PMC7920476; doi:10.3390/microorganisms9020411), 2021-02-16
Supplement: microorganisms-09-00411-s001.pdf [file microorganisms-09-00411-s001.pdf]

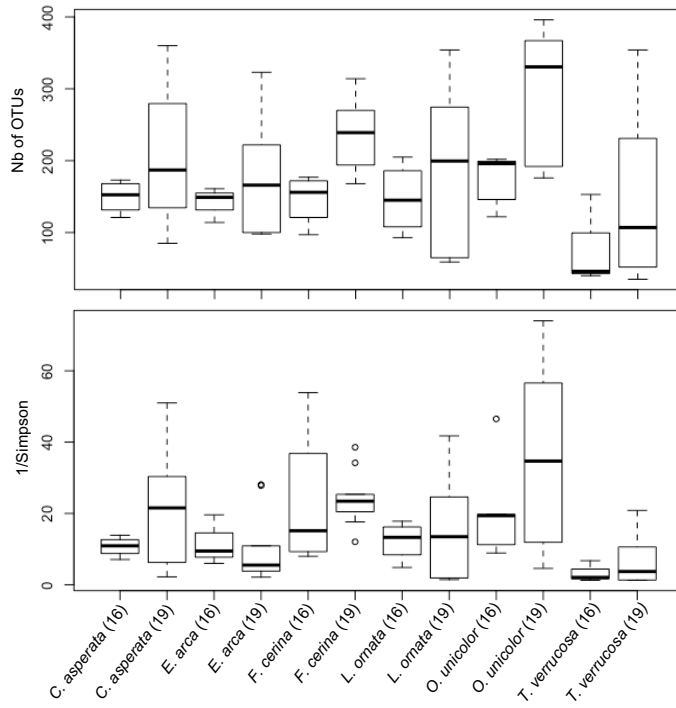

**Supplementary Figure 1: Boxplots representing the distribution of OTU richness and diversity (Simpson indices, expressed in effective number of species) of six species of Unionidae mussels sampled at the same site on the Sipse River, AL, USA, across two years.** Overall differences between samplings were assessed using a Kruskal-Wallis test, with no significant differences detected. Mussel species were *Cyclonaias asperata*, *Elliptio arca*, *Fusconaia cerina*, *Lampsilis ornata*, *Obovaria unicolor* and *Tritogonia verrucosa*.

**Supplementary Table 1: Number of individuals collected from six species of Unionidae mussels sampled at the same site on the Sipse River, AL, USA, across two years.** “First reported” column refers to the study where the sequences for the microbiome for a given species were originally published. The phylogenetic tribe of each species (a subfamily-level classification commonly used in freshwater mussels) is indicated, according to Lopes-Lima et al. 2016. The age-length regressions were performed using data published by Haag & Rypel, 2011.

| Tribe            | Mussel species              | Samples (2016) | First reported          | Average Size (cm) | Predicted Age (y) | Samples (2019) | First reported | Average Size (cm) | Predicted Age (y) |
|------------------|-----------------------------|----------------|-------------------------|-------------------|-------------------|----------------|----------------|-------------------|-------------------|
| Lampsilini       | <i>Lampsilis ornata</i>     | 4              | Weingarten et al., 2019 | 84.5±15.4         | 8.9±0.7           | 9              | this study     | 82.5±13.3         | 8.9±0.4           |
|                  | <i>Obovaria unicolor</i>    | 5              | Weingarten et al., 2019 | 37.6±7.0          | 16.9±1.4          | 10             | this study     | 32.4±5.15         | 16.2±1.1          |
| Pleurobemi<br>ni | <i>Elliptio arca</i>        | 4              | McCauley et al., 2020   | 64.3±10.1         | 12.6±0.6          | 10             | this study     | 60.9±15.1         | 12.3±1.2          |
|                  | <i>Fusconaia cerina</i>     | 4              | Weingarten et al., 2019 | 46.3±6.1          | 17.2±0.8          | 10             | this study     | 40.6±12.3         | 15.4±1.7          |
| Quadrulini       | <i>Cyclonaias asperata</i>  | 4              | Weingarten et al., 2019 | 48.6±4.8          | 18.9±0.7          | 10             | this study     | 43.3±7.31         | 18.1±1.1          |
|                  | <i>Tritogonia verrucosa</i> | 4              | McCauley et al., 2020   | 84.6±12.1         | 24.5±0.9          | 10             | this study     | 78.5±15.3         | 23.4±2.1          |

**Supplementary Table 2: Physicochemical data at the same site on the Sipsey River, AL, USA, across two years.** Three measurements of each environmental parameter were recorded between in July 2016 and June 2019. Data shown reflects the means of these three measurements and the standard error.

| Year | Temperature (°C) | pH         | DO (mg/L)  | DO (%)     | Ammonia (ug/L) | Orthophosphate (ug/L) | Nitrate/Nitrite (ug/L) | Discharge (m <sup>3</sup> /sec) |
|------|------------------|------------|------------|------------|----------------|-----------------------|------------------------|---------------------------------|
| 2016 | 27.5 ± 0.5       | 7.24 ± 0.1 | 6.96 ± 0.1 | 88.1 ± 0.5 | 8.4 ± 1.3      | 2.2 ± 1.1             | 179.1 ± 1.8            | 0.24 ± 0.1                      |
| 2019 | 26.8 ± 0.6       | 7.17 ± 0.1 | 7.1 ± 0.1  | 87.5 ± 0.5 | 10.3 ± 0.6     | 2.4 ± 0.5             | 183 ± 2.8              | 0.24 ± 0.1                      |

**Supplementary Table 3: Genbank identifiers for sequences that were used to construct the mussel phylogeny for the six species of mussels sampled from two sites in the Sipsey River, AL, USA.** Sequences included two nuclear markers (ITS 1, and 5.8S rRNA) and three mitochondrial markers (CO1, NADH, and 16S rRNA). Sequences of *Margaritifera margaritifera* was included as an outgroup.

| Species                            | ITS1       | 5.8S       | NADH       | CO1        | 16S        |
|------------------------------------|------------|------------|------------|------------|------------|
| <i>Lampsilis ornata</i>            | AY365193.1 | AY365193.1 | AY158748.1 | AY365193.1 | AY365193.1 |
| <i>Obovaria unicolor</i>           | MH167930.1 | MH167930.1 | KF035419.1 | KF035279.1 | AF232786.1 |
| <i>Elliptio arca</i>               | DQ383437.1 | -          | AY655093.1 | AY654995.1 | -          |
| <i>Fusconaia cerina</i>            | DQ383441.1 | MH133825.1 | AY613792.1 | DQ298538.1 | AY655039.1 |
| <i>Cyclonaias asperata</i>         | -          | -          | AY158806.1 | AYQ97026   | -          |
| <i>Tritogonia verrucosa</i>        | MH362610.1 | MH362610.1 | MH633591.1 | KT285657   | AY655079.1 |
| <i>Margaritifera margaritifera</i> | AY346467.1 | DQ060193.1 | EF446105.1 | AF303342.1 | DQ060167.1 |

**Supplemental Table 4. Identity and network parameters of strong ( $\rho > 0.75$ ) significant ( $\text{adj}p < 0.05$ ) co-occurring bacterial phyla identified in the microbiomes of six species of Unionidae mussels sampled at the same site on the Sipsey River, AL, USA, across two years.** Bacterial phyla are measured by three topological centralities including eccentricity (shortest path length between this node and any other), degree (number of undirected edges) and stress (number of shortest paths connecting to this node) values. Species were *Lampsilis ornata*, *Obovaria unicolor*, *Elliptio arca*, *Fusconaia cerina*, *Cyclonaias asperata* and *Tritogonia verrucosa*.

| Species                  | Year | Bacterial Phyla                          | Eccentricity | Degree | Stress |
|--------------------------|------|------------------------------------------|--------------|--------|--------|
| All Species              | 2016 | BRC1                                     | 1            | 1      | 0      |
|                          |      | Spirochaetes                             | 1            | 1      | 0      |
|                          |      | Deinococcus-Thermus                      | 1            | 1      | 0      |
|                          |      | Armatimonadetes                          | 1            | 1      | 0      |
| All Species              | 2019 | Armatimonadetes                          | 1            | 1      | 0      |
|                          |      | Ignavibacteriae                          | 1            | 1      | 0      |
|                          |      | Proteobacteria                           | 1            | 1      | 0      |
|                          |      | Planctomycetes                           | 1            | 1      | 0      |
| <i>L. ornata</i>         | 2016 | Fusobacteria                             | 1            | 1      | 0      |
|                          |      | Cyanobacteria                            | 1            | 1      | 0      |
|                          | 2019 | Armatimonadetes                          | 1            | 1      | 0      |
|                          |      | Ignavibacteriae                          | 1            | 1      | 0      |
|                          |      | Bacteroidetes                            | 1            | 1      | 0      |
|                          |      | Chloroflexi                              | 1            | 1      | 0      |
|                          |      | Proteobacteria                           | 1            | 1      | 0      |
|                          |      | Planctomycetes                           | 1            | 1      | 0      |
| <i>O. unicolor</i>       | 2016 | Deinococcus-Thermus                      | 1            | 1      | 0      |
|                          |      | Armatimonadetes                          | 1            | 1      | 0      |
|                          | 2019 | Armatimonadetes                          | 1            | 1      | 0      |
|                          |      | Ignavibacteriae                          | 1            | 1      | 0      |
|                          |      | Bacteroidetes                            | 1            | 1      | 0      |
|                          |      | Chloroflexi                              | 1            | 1      | 0      |
|                          |      | Proteobacteria                           | 1            | 1      | 0      |
|                          |      | Planctomycetes                           | 1            | 1      | 0      |
| <i>E. arca</i>           | 2016 | Verrucomicrobia                          | 1            | 1      | 0      |
|                          |      | Bacteroidetes                            | 1            | 1      | 0      |
|                          | 2019 | Chlamydiae                               | 1            | 1      | 0      |
|                          |      | Planctomycetes                           | 2            | 1      | 0      |
|                          |      | Proteobacteria                           | 2            | 1      | 0      |
|                          |      | Verrucomicrobia candidate division WPS-1 | 1            | 2      | 2      |
| <i>F. cerina</i>         | 2016 | BRC1                                     | 1            | 1      | 0      |
|                          |      | Spirochaetes                             | 1            | 1      | 0      |
|                          |      | Planctomycetes                           | 1            | 1      | 0      |
|                          |      | Fusobacteria                             | 1            | 1      | 0      |
|                          | 2019 | Proteobacteria                           | 1            | 1      | 0      |
|                          |      | Cyanobacteria                            | 1            | 1      | 0      |
|                          |      | Planctomycetes                           | 1            | 1      | 0      |
|                          |      | Actinobacteria                           | 1            | 1      | 0      |
| <i>C. asperata</i>       | 2016 | Chloroflexi                              | 1            | 1      | 0      |
|                          |      | candidate_division_WPS-1                 | 1            | 1      | 0      |
|                          |      | Deinococcus-Thermus                      | 1            | 1      | 0      |
|                          |      | Acidobacteria                            | 1            | 1      | 0      |
|                          |      | Cyanobacteria                            | 1            | 1      | 0      |
|                          |      | Bacteroidetes                            | 1            | 1      | 0      |
|                          |      | Planctomycetes                           | 1            | 1      | 0      |
|                          |      | Verrucomicrobia                          | 1            | 1      | 0      |
|                          | 2019 | Acidobacteria                            | 1            | 2      | 2      |
|                          |      | Chlamydiae                               | 2            | 1      | 0      |
|                          |      | Chloroflexi                              | 2            | 1      | 0      |
|                          |      | Verrucomicrobia                          | 1            | 1      | 0      |
|                          |      | Cyanobacteria/Chloroplast                | 1            | 1      | 0      |
|                          |      | Planctomycetes                           | 1            | 1      | 0      |
| <i>T. verrucosa</i>      | 2016 | Actinobacteria                           | 1            | 1      | 0      |
|                          |      | Cyanobacteria                            | 1            | 1      | 0      |
|                          | 2019 | Armatimonadetes                          | 1            | 1      | 0      |
|                          |      | Ignavibacteria                           | 1            | 1      | 0      |
|                          |      | Verrucomicrobia                          | 1            | 2      | 0      |
|                          |      | Actinobacteria                           | 1            | 2      | 0      |
|                          |      | Chloroflexi                              | 1            | 2      | 0      |
|                          |      | Chlamydiae                               | 1            | 1      | 0      |
| candidate_division_WPS-1 | 1    | 1                                        | 0            |        |        |
